# Supplementary material for: Four [Tp*W(μ3-S)3Cu3(μ3-Br)]-based clusters: synthesis, structural characterization and third-order NLO properties
Source: Royal Society of Chemistry journal article supplement (doi:10.1039/c1dt10230c), 2011-01-01
Supplement: c1dt10230c.pdf [file c1dt10230c.pdf]

## Electronic Supporting Information

### Four [Tp\*W( $\mu_3$ -S) $_3$ Cu $_3$ ( $\mu_3$ -Br)]-based clusters: synthesis, structural characterization and third-order NLO properties

Xue Lü,<sup>a</sup> Xi Chen,<sup>a</sup> Zhi-Gang Ren,<sup>a</sup> Jian-Ping Lang<sup>\*,a,b</sup> Dong Liu,<sup>a</sup> and Zhen-Rong Sun<sup>\*,c</sup>

<sup>a</sup> College of Chemistry, Chemical Engineering and Materials Science, Soochow University, Suzhou 215123, Jiangsu, P. R. China

<sup>b</sup> State Key Laboratory of Coordination Chemistry, Nanjing University, Nanjing 210093, Jiangsu, P. R. China

<sup>c</sup> Department of Physics, East China Normal University, Shanghai 200062, People's Republic of China

## Table of Contents

|                 |                                                                                                                                                                                                                                                                                                                                  |     |
|-----------------|----------------------------------------------------------------------------------------------------------------------------------------------------------------------------------------------------------------------------------------------------------------------------------------------------------------------------------|-----|
| <b>Fig. S1</b>  | The positive-ion ESI mass spectrum of <b>2</b> in DMF.....                                                                                                                                                                                                                                                                       | S3  |
| <b>Fig. S2</b>  | The positive-ion ESI mass spectrum of <b>3</b> in DMF.....                                                                                                                                                                                                                                                                       | S4  |
| <b>Fig. S3</b>  | The negative-ion ESI mass spectrum of <b>3</b> in DMF.....                                                                                                                                                                                                                                                                       | S5  |
| <b>Fig. S4</b>  | The positive-ion ESI mass spectrum of <b>4</b> in DMF.....                                                                                                                                                                                                                                                                       | S6  |
| <b>Fig. S5</b>  | The positive-ion ESI mass spectrum of <b>5</b> in DMF.....                                                                                                                                                                                                                                                                       | S7  |
| <b>Fig. S6.</b> | View of the arrangement of the cationic chain and the cluster anion of <b>3</b> along the <i>bc</i> plane.....                                                                                                                                                                                                                   | S8  |
| <b>Fig. S7.</b> | View of the 2D network derived from the hydrogen bonding interactions among the MA ligands and MeOH solvent molecules in <b>4</b> ·2MeOH.....                                                                                                                                                                                    | S8  |
| <b>Fig. S8.</b> | (a) The H-bonding 1D chain in <b>5</b> ·MeCN·0.5Et <sub>2</sub> O extended along the <i>c</i> axis. (b) The H-bonding 2D network in <b>5</b> ·MeCN·0.5Et <sub>2</sub> O viewed along the <i>ac</i> plane. (c) The 3D H-bound structure in <b>5</b> ·MeCN·0.5Et <sub>2</sub> O looking down the <i>c</i> axis.....                | S9  |
| <b>Fig. S9</b>  | DFWM signal for the DMF solutions of <b>2</b> (a), <b>4</b> (b) and <b>5</b> (c) with concentrations $5.56 \times 10^{-4}$ M for <b>2</b> , $2.75 \times 10^{-4}$ M for <b>4</b> and $5.54 \times 10^{-4}$ M for <b>5</b> . The black solid squares are experimental data, and the red solid curves are the theoretical fit..... | S10 |

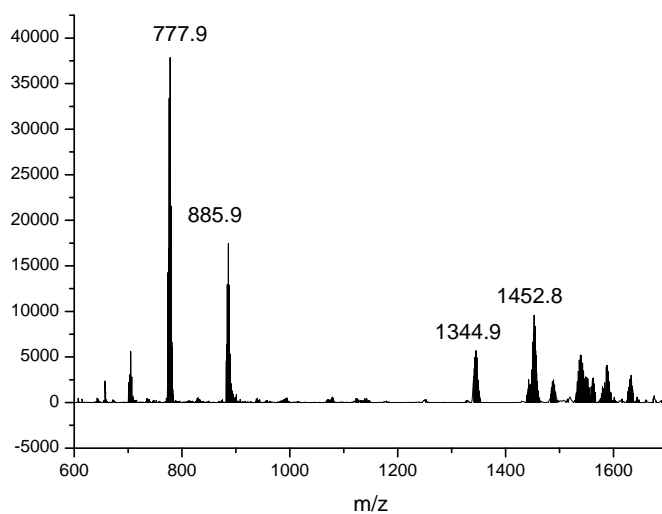

(a)

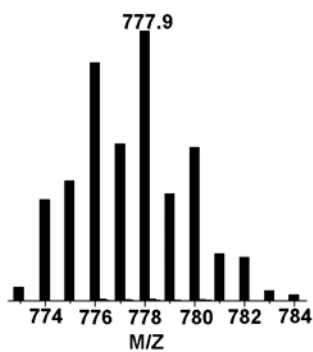

(b)

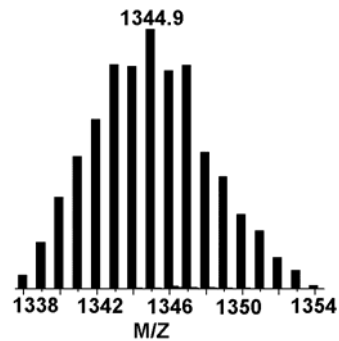

(c)

**Figure S1.** (a) The positive-ion ESI mass spectrum of **2**. (b) View of the observed (dark) and the calculated (gray) isotopic patterns for the  $[\{Tp^*WS_3Cu_2\}+DMF]^+$  cation. (c) View of the observed (dark) and the calculated (gray) isotopic patterns for the  $[(Tp^*WS_3)_2Cu_3]^+$  cation (c).

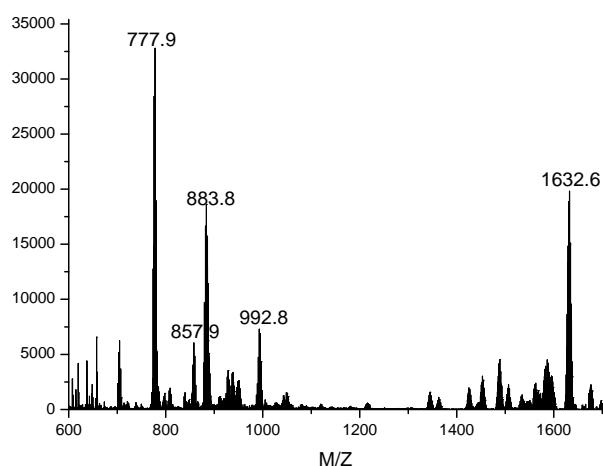

(a)

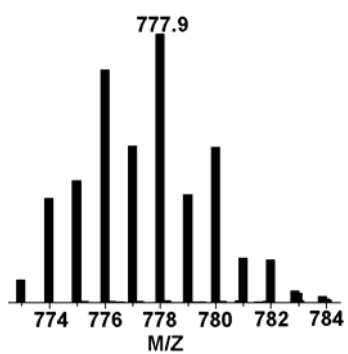

(b)

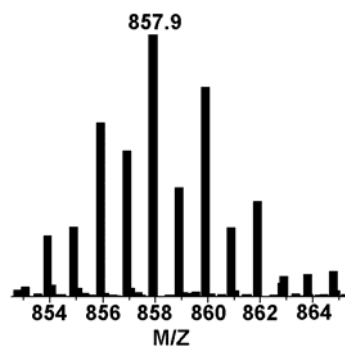

(c)

**Figure S2.** (a) The positive-ion ESI mass spectrum of **3** in DMF. (b) View of the observed (dark) and the calculated (gray) isotopic patterns for the  $[\{\text{Tp}^*\text{WS}_3\text{Cu}_2\}+\text{DMF}]^+$  cation. (c) View of the observed (dark) and the calculated (gray) isotopic patterns for the  $[\{\text{Tp}^*\text{WS}_3\text{Cu}_2\text{Br}\}+\text{DMF}+\text{H}]^+$  cation.

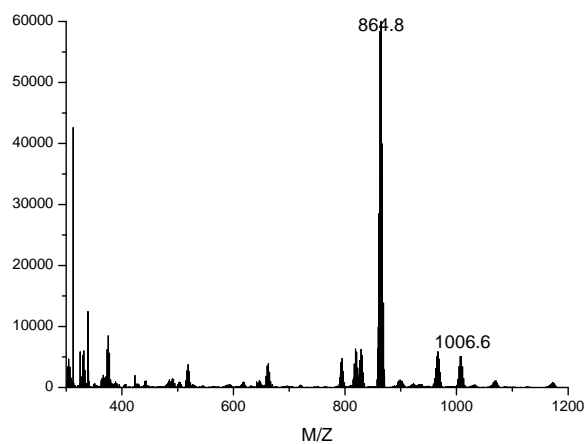

(a)

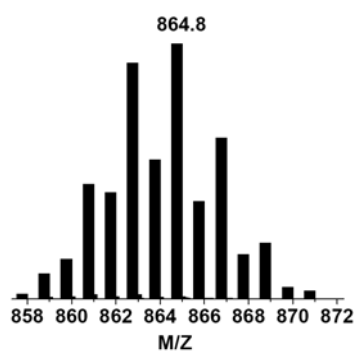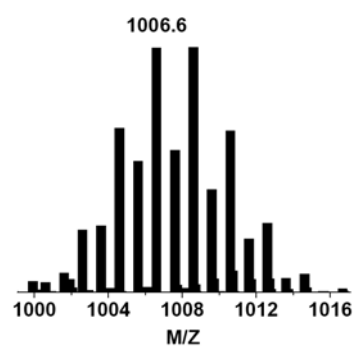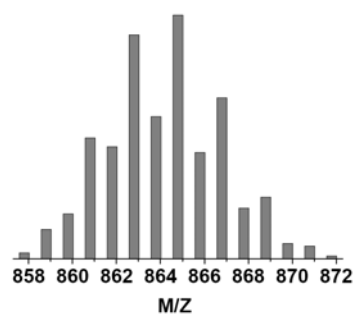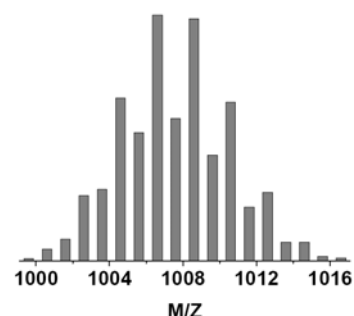

(b)

(c)

**Figure S3.** (a) The negative-ion ESI mass spectrum of **3** in DMF. (b) View of the observed (dark) and the calculated (gray) isotopic patterns for the  $[\text{Tp}^*\text{WS}_3\text{Cu}_2\text{Br}_2]^-$  anion. (c) View of the observed (dark) and the calculated (gray) isotopic patterns for the  $[\text{Tp}^*\text{WS}_3\text{Cu}_3\text{Br}_3]^-$  anion.

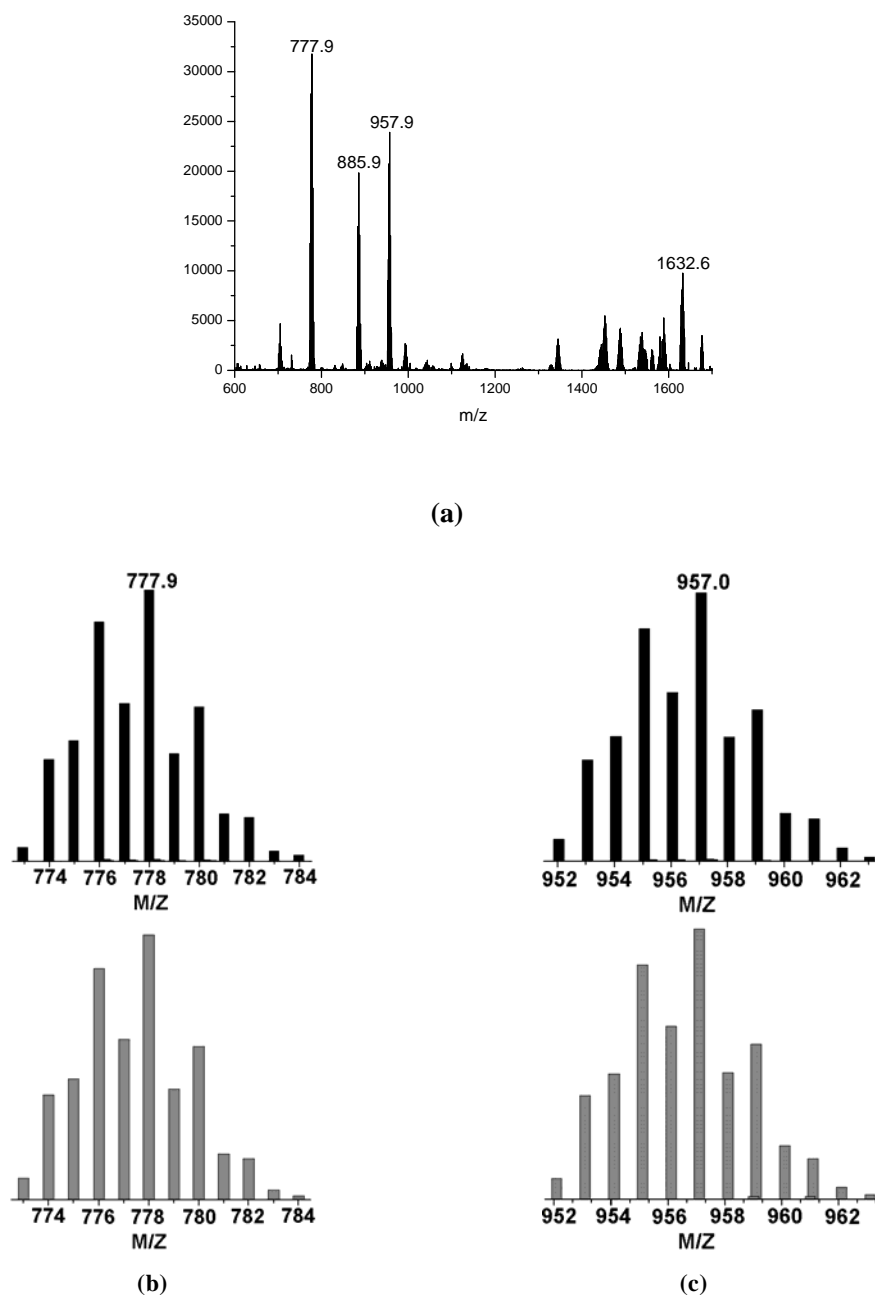

**Figure S4.** (a) The positive-ion ESI mass spectrum of **4** in DMF. (b) View of the observed (dark) and the calculated (gray) isotopic patterns for the  $[\{\text{Tp}^*\text{WS}_3\text{Cu}_2\}+\text{DMF}]^+$  cation. (c) View of the observed (dark) and the calculated (gray) isotopic patterns for the  $[\{\text{Tp}^*\text{WS}_3\text{Cu}_2(\text{MA})_2\}]^+$  cation.

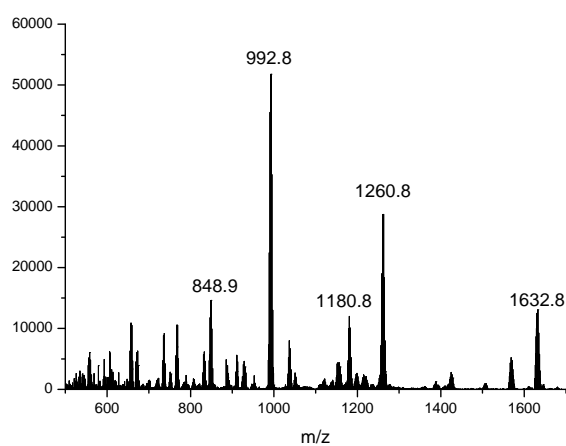

(a)

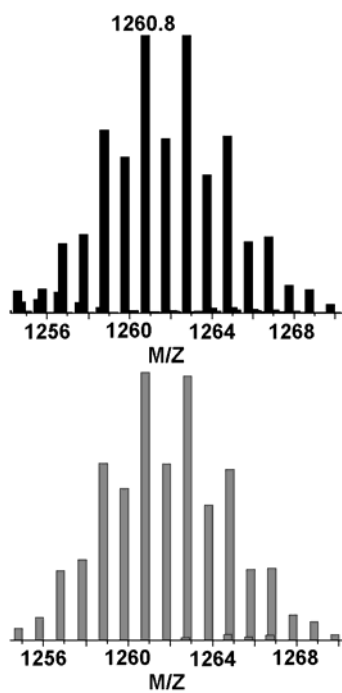

(b)

**Figure S5.** (a) The positive-ion ESI mass spectrum of **5** in DMF. (b) View of the observed (dark) and the calculated (gray) isotopic patterns for the  $[\{Tp^*WS_3Cu_3Br_3(MA)_2\}+2H]^+$  cation.

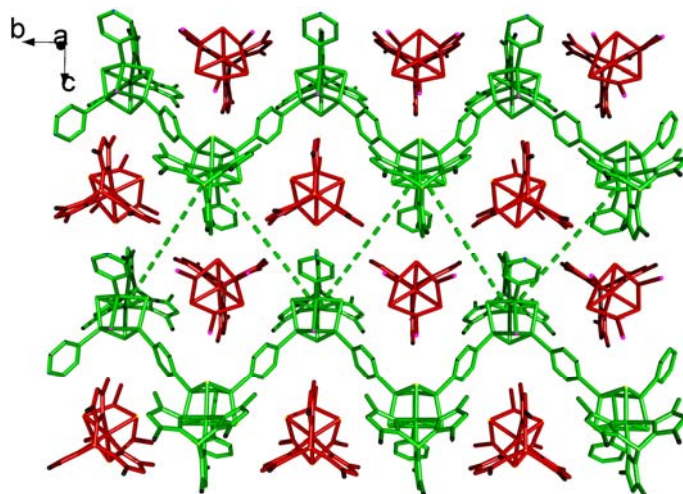

**Figure S6.** View of the arrangement of the cationic chain and the cluster anion of  $3 \cdot \text{H}_2\text{O}$  along the *bc* plane.

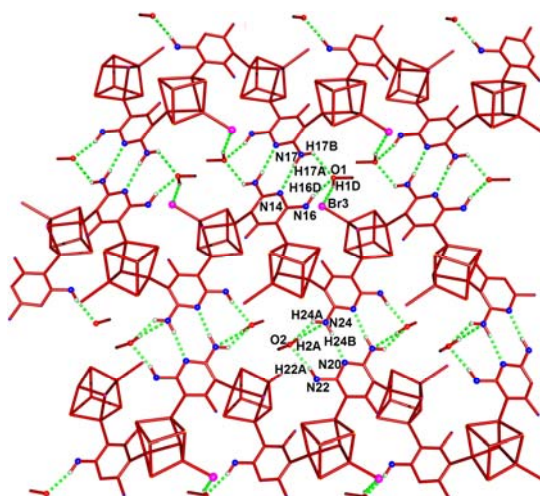

**Figure S7.** View of the 2D network derived from the hydrogen bonding interactions among the MA ligands and MeOH solvent molecules in  $4 \cdot 2\text{MeOH}$ .



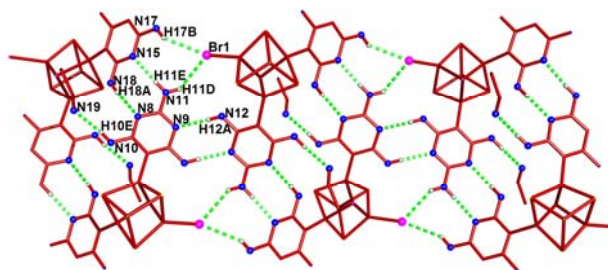

(a)

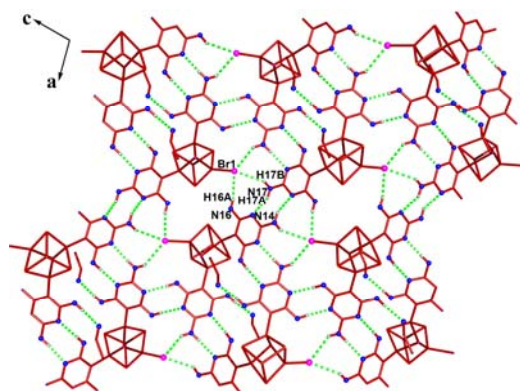

(b)

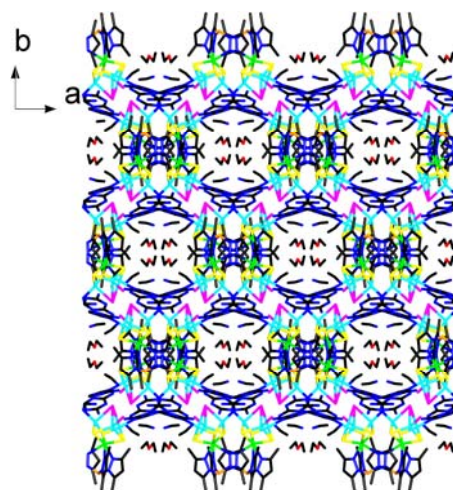

(c)

**Figure S8.** (a) The H-bonding 1D chain in  $5\cdot\text{MeCN}\cdot 0.5\text{Et}_2\text{O}$  extended along the  $c$  axis. (b) The H-bonding 2D network in  $5\cdot\text{MeCN}\cdot 0.5\text{Et}_2\text{O}$  viewed along the  $ac$  plane. (c) The 3D H-bond structure in  $5\cdot\text{MeCN}\cdot 0.5\text{Et}_2\text{O}$  looking down the  $c$  axis.

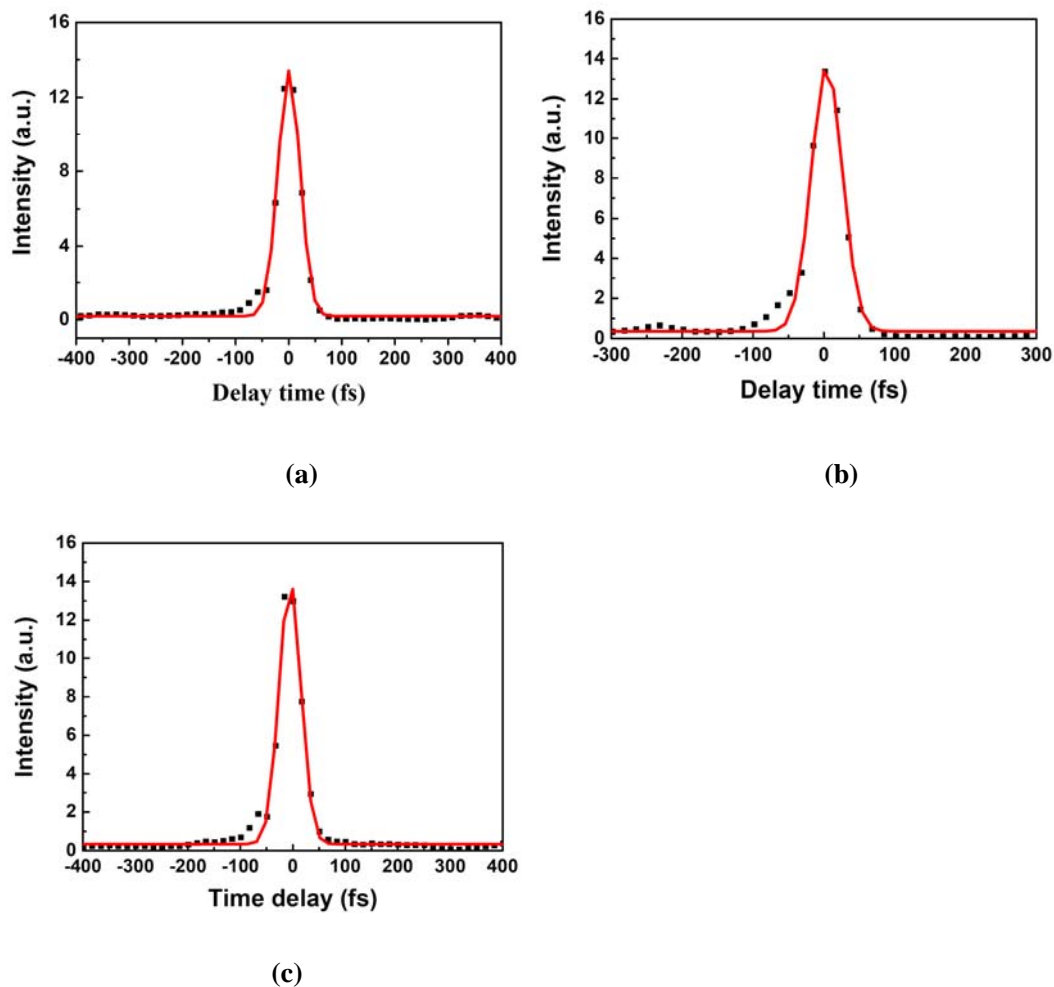

**Figure S9.** DFWM signal for the DMF solutions of **2** (a), **4** (b) and **5** (c) with concentrations  $5.56 \times 10^{-4}$  M for **2**,  $2.75 \times 10^{-4}$  M for **4** and  $5.54 \times 10^{-4}$  M for **5**. The black solid squares are experimental data, and the red solid curves are the theoretical fit.
